# Supplementary material for: Proline metabolism regulates replicative lifespan in the yeast Saccharomyces cerevisiae
Source: PubMed Central journal article supplement (PMC6780008; doi:10.15698/mic2019.10.694), 2019-09-24
Supplement: mic-06-482-s01.pdf [file mic-06-482-s01.pdf]

## Supplemental Data

### **Proline metabolism regulates replicative lifespan in the yeast *Saccharomyces cerevisiae***

**Yukio Mukai<sup>1, \*</sup>, Yuka Kamei<sup>1</sup>, Xu Liu<sup>1</sup>, Shan Jiang<sup>1</sup>, Yukiko Sugimoto<sup>2</sup>, Noreen Suliani binti Mat Nanyan<sup>2</sup>, Daisuke Watanabe<sup>2</sup>, Hiroshi Takagi<sup>2, \*</sup>**

<sup>1</sup>Department of Frontier Bioscience, Faculty of Bioscience, Nagahama Institute of Bio-Science and Technology, 1266 Tamura, Nagahama, Shiga 526-0829, Japan

<sup>2</sup>Division of Biological Science, Graduate School of Science and Technology, Nara Institute of Science and Technology, 8916-5 Takayama, Ikoma, Nara 630-0192, Japan

**\*Corresponding Authors:** Yukio Mukai, Department of Bioscience, Faculty of Bioscience, Nagahama Institute of Bio-Science and Technology, 1266 Tamura, Nagahama, Shiga 526-0829, Japan; Tel.: +81-749-64-8163; Fax: +81-749-64-8140; E-mail: [y\\_mukai@nagahama-i-bio.ac.jp](mailto:y_mukai@nagahama-i-bio.ac.jp).  
Hiroshi Takagi, Division of Biological Science, Graduate School of Science and Technology, Nara Institute of Science and Technology, 8916-5 Takayama, Ikoma, Nara 630-0192, Japan; Tel.: +81-743-72-5420; Fax: +81-743-72-5429; E-mail: [hiro@bs.naist.jp](mailto:hiro@bs.naist.jp).

#### **This PDF file includes:**

Supplementary Tables S1 - S2

Supplementary Figures S1 - S4

**TABLE S1.** Yeast *S. cerevisiae* strains used in the study.

| Strain                                                       | Genotype                                                            | Source                |
|--------------------------------------------------------------|---------------------------------------------------------------------|-----------------------|
| BY4741 (WT)                                                  | <i>MATa ura3Δ0 leu2Δ0 his3Δ1 met15Δ0</i>                            | EUROSCARF             |
| BY1-put1 ( $\Delta put1$ )                                   | BY4741 <i>put1::kanMX4</i>                                          | Yeast MATa Collection |
| BY1-PRO1-I150T ( <i>PRO1-I150T</i> )                         | BY4741 <i>PRO1-I150T</i>                                            | This study            |
| BY1-put1-PRO1-I150T ( $\Delta put1 PRO1-I150T$ )             | BY4741 <i>put1::kanMX4 PRO1-I150T</i>                               | This study            |
| BY1-car2 ( $\Delta car2$ )                                   | BY4741 <i>car2::kanMX4</i>                                          | Yeast MATa Collection |
| BY1-pro1 ( $\Delta pro1$ )                                   | BY4741 <i>pro1::kanMX4</i>                                          | Yeast MATa Collection |
| BY1-pro2 ( $\Delta pro2$ )                                   | BY4741 <i>pro2::kanMX4</i>                                          | Yeast MATa Collection |
| BY4741u (WT)                                                 | <i>MATa ura3Δ0</i>                                                  | [44]                  |
| BY1-MSN2OE (MSN2-OE)                                         | BY4741u <i>P<sub>MSN2</sub>::URA3-P<sub>TDH3</sub></i>              | This study            |
| BY1-MSN2OE-put1 (MSN2-OE $\Delta put1$ )                     | BY4741u <i>P<sub>MSN2</sub>::URA3-P<sub>TDH3</sub> put1Δ::kanMX</i> | This study            |
| BY1-msn2/4 ( $\Delta msn2 \Delta msn4$ )                     | BY4741u <i>msn2::URA3 msn4::kanMX6</i>                              | This study            |
| CAY29 (WT)                                                   | <i>MATa ura3-52</i>                                                 | [45]                  |
| CAY191 ( $\Delta put4 \Delta gap1 \Delta agp1 \Delta gnp1$ ) | <i>MATa ura3-52 put4Δ gap1Δ agp1Δ gnp1Δ</i>                         | [37]                  |

**TABLE S2.** Oligonucleotide primers used in the study.

| Oligonucleotide        | Sequence (5' → 3')                                                                                  |
|------------------------|-----------------------------------------------------------------------------------------------------|
| MSN2_up_F              | TTGTTTCCAGCGAAAGAGAC                                                                                |
| MSN2_from_1_to_534_R   | TGAAGTTTGAGGCGATAAATTAGT                                                                            |
| TDH3_up_F(-132_-108)   | ACGGTAGGTATTGATTGTAATTCTG                                                                           |
| MSN2_R2                | ATCAAAGGCACAGCAGACT                                                                                 |
| MSN2+URA3-Fw           | GTATCTTCCTCATATTTTTTCGGGAAGATCACAACAGTA<br>GTAGCAAGGTATTTTCATACGCCAAGAGGCTACGATTCTG<br>GTAATCTCCGAG |
| MSN2+URA3-Rv           | AACAATAAGCCGTAAGCTTCATAAGTCATTGAACAGA<br>ATTATCTTATGAAGAAAGATCTATCGAATTAGTAATAAC<br>TGATATAATTAATTG |
| Fw $\Delta$ msn4-kanMX | TTCGGCTTTTTTTTCTTTTCTTCTTATTA AAAACAATAT<br>AATGGGTAAGGAAAAGACTCA                                   |
| Rv $\Delta$ msn4-kanMX | TAGCTTGTCTTGCTTTTATTTGCTTTTGACCTTATTTTTT<br>TTAGAAAACTCATCGAGCA                                     |

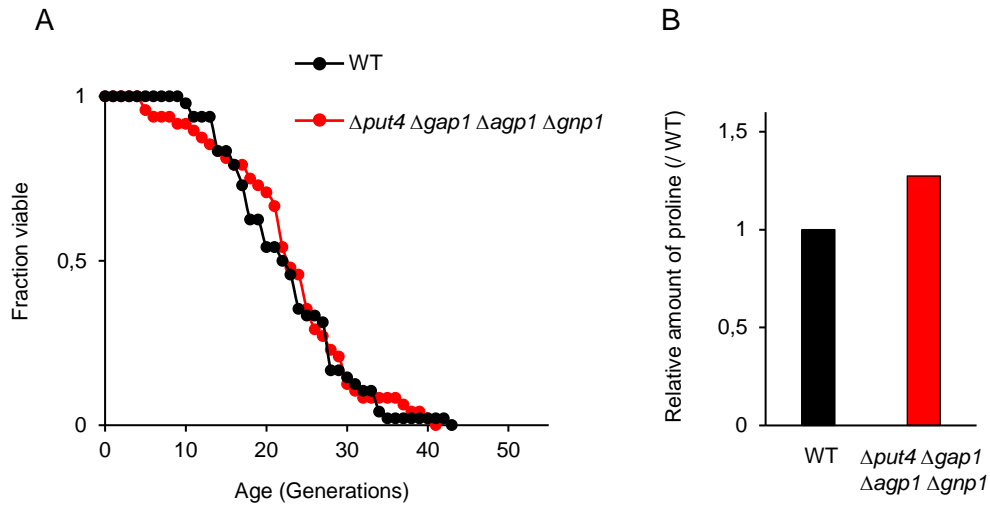

**FIGURE S1.** Replicative lifespan (A) and intracellular proline levels (B) in the wild-type (WT; CAY29) and quadruple deletion mutant (CAY191) strains of proline transporter genes. The experiment (B) was done on YPD medium with only one replica.

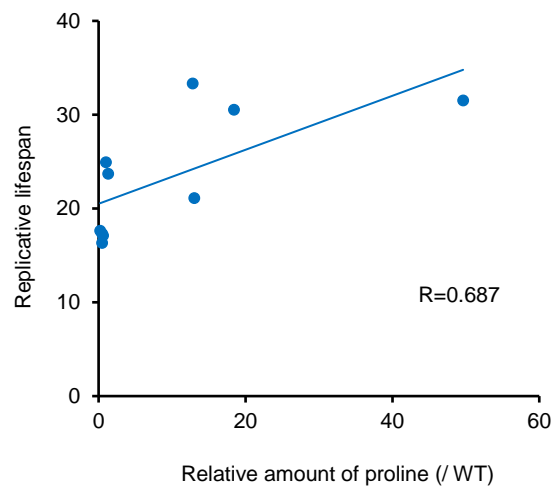

**FIGURE S2.** Correlation analysis between proline levels and replicative lifespan. All strains shown in Figures 1 and 2 were used in this analysis. Scatter plot of proline levels and lifespan in the wild-type (WT; BY4741) and mutant strains at stationary phase.

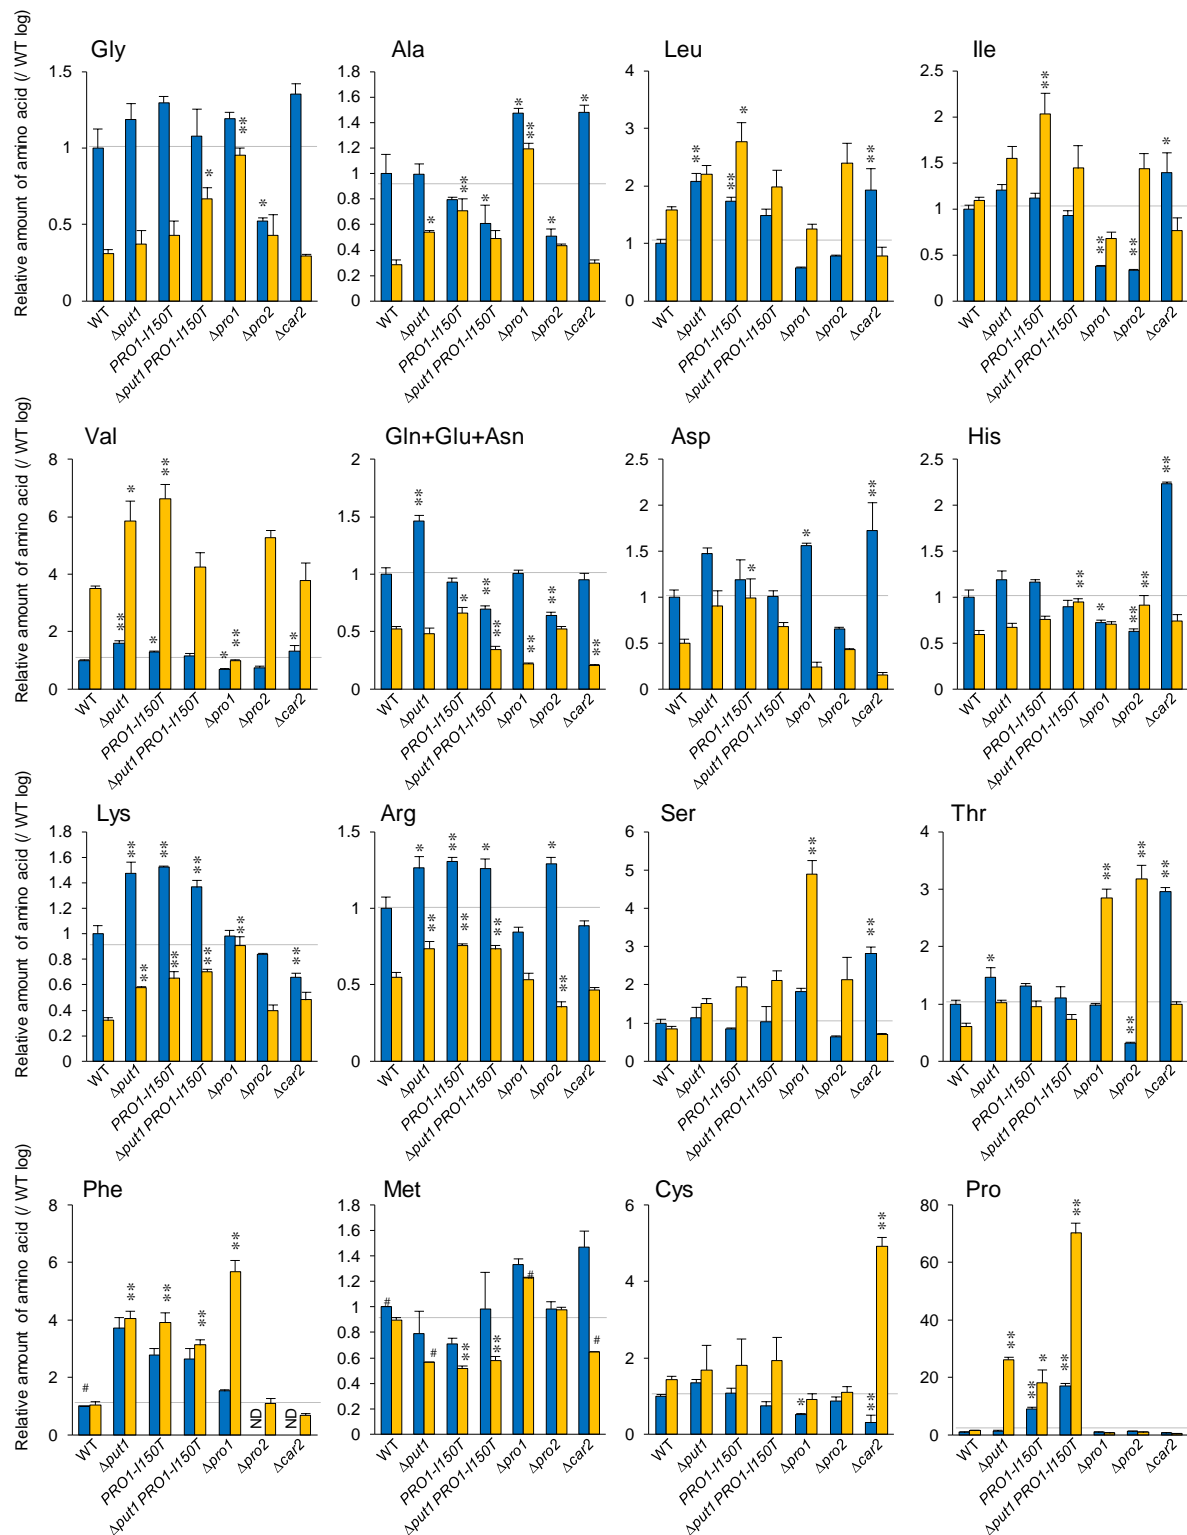

**FIGURE S3.** Amino acid analysis of yeast mutants involved in proline metabolism at log phase (blue) and stationary phase (orange). The values are the means and standard deviation of results from three independent experiments. \*,  $p < 0.05$ ; \*\*,  $p < 0.01$ , versus the wild-type strain (WT; BY4741) calculated with the Dunnett's test. #, detected in only one sample; ND, not detected.

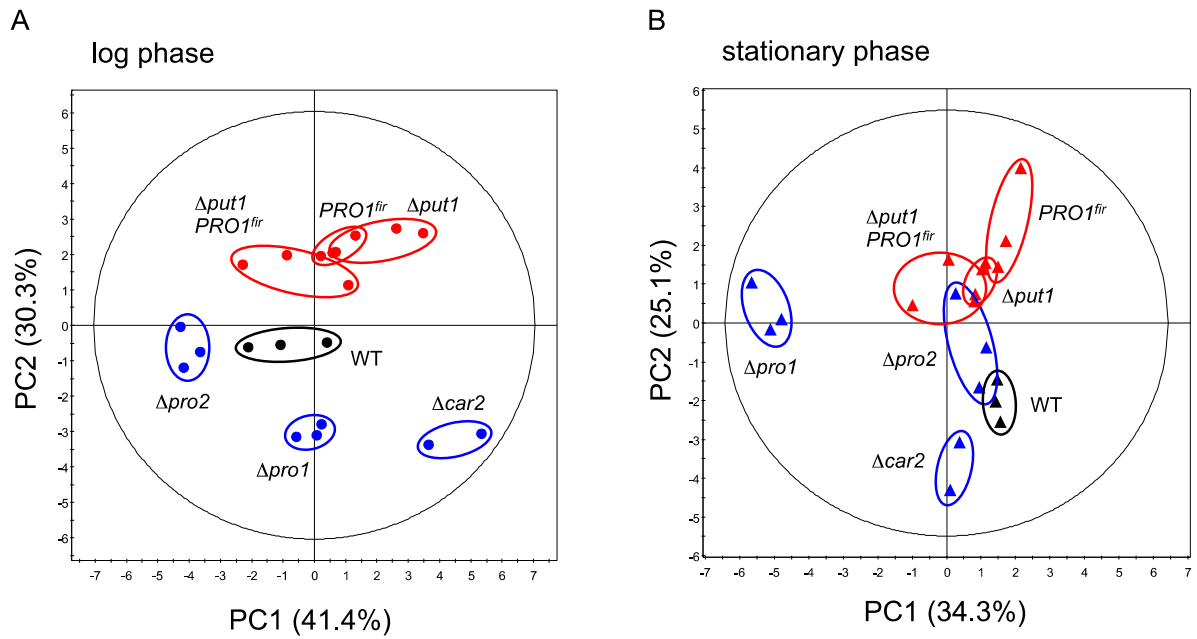

**FIGURE S4.** PCA score plot of amino acid analysis data from yeast mutants involved in proline metabolism. Each point represents an individual batch from the wild-type strain (WT; BY4741) and the mutants for indicated gene in the log phase (A) and the stationary phase (B). **Note that *PRO1<sup>fir</sup>* indicates *PRO1-I150T* described in the text.**
